# Supplementary material for: Formation and crystal structure of an unexpected inclusion complex of a metal-free phthalocyanine and oxalic acidElectronic supplementary information (ESI) available: experimental procedure to prepare compound 3 and its characterising data. See http://www.rsc.org/suppdata/cc/b1/b111133g/
Source: Royal Society of Chemistry journal article supplement (doi:10.1039/b111133g), 2002-02-22
Supplement: b111133g.doc [file b111133g.doc]

# Supplementary Material (ESI) for Chemical Communications

# This journal is © The Royal Society of Chemistry 2002

*Preparation* of **3**: a mixture of dinitrile **2** (80 mg, 0.33 mmol), anhydrous CeCl3 (5 mg, 0.02 mmol) and DBU (0.2 mL) in *n*-pentanol (3 mL) was heated at 160oC under nitrogen for 24 h. After removing the volatiles *in vacuo*, the residue was chromatographed on a silica gel column using CH2Cl2 as eluent. A green band was developed which was collected and rotary evaporated to give a green solid (57 mg, 71%). By using hexane / CH2Cl2 (20:1) instead of CH2Cl2 as eluent, compound **3** (contaminated with a small amount of other constitutional isomers) and the C2V isomer of **3** (ca. 1% yield) could be separated. The former was further purified by recrystallisation from CHCl3 / MeOH.

*Selected data* for **3**: *R*f (hexane / ethyl acetate = 5:1) 0.79; 1H NMR (CDCl3, 300 MHz)  9.10 (d, *J* = 7.5 Hz, 4 H, Ar-H), 8.08 (t, *J* = 7.5 Hz, 4 H, Ar-H), 7.72 (d, *J* = 7.5 Hz, 4 H, Ar-H), 4.70 (t, *J* = 5.4 Hz, 4 H, OCH), 2.57-2.68 (m, 4 H, CH), 1.52 (d, *J* = 6.6 Hz, 24 H, Me), 1.22 (d, *J* = 6.6 Hz, 24 H, Me), -0.06 (br s, 2 H, NH); LSI-MS *m*/*z* 970.5991 (calc. for M+ 970.5833); UV-Vis (CHCl) [max, nm (log )] 319 (4.69), 633 (4.38), 667 (4.51), 700 (5.02), 731 (5.05). Anal. Calc. for C60H74N8O4: C, 74.20; H, 7.68; N,11.54. Found: C, 73.97; H, 7.70; N, 11.14%.

*Selected data for the C2V isomer*: *R*f (hexane / ethyl acetate = 5:1) 0.79; 1H NMR (CDCl3, 300 MHz)  9.05-9.15 (m, 4 H, Ar-H), 8.05-8.11 (m, 4 H, Ar-H), 7.71 (t, *J* = 8.1 Hz, 4 H, Ar-H), 4.67-4.71 (m, 2 H, OCH), 4.31-4.35 (m, 2 H, OCH), 2.59-2.65 (m, 4 H, CH), 2.34-2.40 (m, 4 H, CH), 1.51-1.54 (m, 24 H, Me), 1.21-1.23 (m, 12 H, Me), 0.76-0.81 (m, 12 H, Me), 0.10 (s, 2 H, NH); UV-Vis (CHCl) [max, nm (log )] 318 (4.70), 634 (4.40), 670 (4.52), 700 (5.07), 731 (5.13).
